# Supplementary material
Source: Elsevier journal article supplement (https://www.sciencedirect.com/science/article/pii/S2173572722002119)
Supplement: mmc1 [file S2173572722002119:mmc1.pdf]

## Supplementary Material

# Intensivists' Perceptions and Attitudes towards Infectious Diseases Management in the ICU: An International Survey (PRACT-INF-ICU)

## Contents

|                                                                                                            |    |
|------------------------------------------------------------------------------------------------------------|----|
| <a href="#">Table of contents</a> .....                                                                    | 1  |
| <a href="#">eAppendix 1: Survey Questions</a> .....                                                        | 2  |
| <a href="#">eAppendix 2: Checklist for Reporting Results of Internet E-Surveys (CHERRIES)</a> .....        | 12 |
| <a href="#">eFig. 1: World map showing the countries and territories of the survey respondents</a> .....   | 15 |
| <a href="#">eTable 1: Characteristics of Respondents who did and did Not Complete the Survey</a> .....     | 16 |
| <a href="#">eTable 2: Knowledge about hospitals' microbiological diagnostic capabilities</a> .....         | 18 |
| <a href="#">eTable 3: Initial antimicrobial therapy (AMT) decision</a> .....                               | 19 |
| <a href="#">eTable 4: Infectious diseases/microbiologists rounds &amp; antimicrobial stewardship</a> ..... | 21 |
| <a href="#">eTable 5: Perceptions regarding seeking non-ICU expertise</a> .....                            | 22 |
| <a href="#">eTable 6: Knowledge &amp; Training</a> .....                                                   | 24 |
| <a href="#">eTable 7: Impact of medicolegal issues and defensive medicine on AMT decision</a> .....        | 26 |

## eAppendix 1: Survey Questions

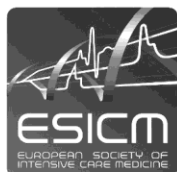

*The Intensive Connection*

### PRACT-INF-ICU

#### Introduction

**Infection affects half of the ICU patients while antimicrobials are prescribed to about 70% of them. It is recommended to start antimicrobial early and appropriately to improve outcome. However, overuse is leading to a widespread resistance.**

**To tackle the problem, stewardship programs are increasingly implemented but the heterogeneity managing infectious diseases in the ICU remains a main obstacle. Many specialties are sharing in the decision-making with poorly defined roles and responsibilities and wide variability even in the same country.**

**The aim of this survey is to understand the current infectious disease practice in the ICU in order to improve infectious disease management including training and role allocation.**

**The questionnaire will take about 15 minutes. The participants' data will be kept anonymous; and the collected data will be analysed for presentation or publication.**

**Endorsed by the European Society of Intensive Care Medicine and its infectious diseases section.**

**Thank you for participating.**

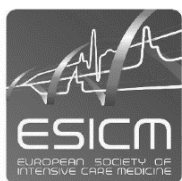

*The Intensive Connection*

## PRACT-INF-ICU

### Tell me about yourself

\* 1. Which country are you currently practicing intensive care medicine (ICM) in?

\* 2. How can you describe your training?

- ☐ Critical care as sole specialty
- ☐ Dual Anaesthesia and critical care
- ☐ Dual critical care and medicine (or any medical subspecialty)
- ☐ Other (please specify)

\* 3. Are you currently member of the ESICM infectious diseases section?

- ☐ Voting member
- ☐ Non-voting member
- ☐ Member of ESICM but not of the infectious diseases section
- ☐ Not a member of ESICM

\* 4. How many years had you practiced ICM including ICU training\*?

\*If dual training please just add the period you spent in ICU

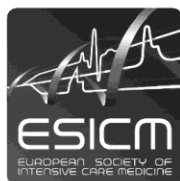

*The Intensive Connection*

## PRACT-INF-ICU

### About your ICU work

\* 5. How can you describe your hospital?

- ☐ University/teaching hospital
- ☐ Public non-teaching hospital
- ☐ Private hospital
- ☐ Other (please specify)

\* 6. What is the capacity of your hospital?

- ☐ Less than 200 beds
- ☐ 200-499 beds
- ☐ 500-999 beds
- ☐ More than 1000 beds

\* 7. What is the total number of critical care beds in your hospital?

- ☐ Less than 10 beds
- ☐ 11-15 beds
- ☐ 16-20 beds
- ☐ 21-24 beds
- ☐ More than 24 beds
- ☐ Other (please specify)

\* 8. How you describe your ICU?

- ☐ Medical ICU
- ☐ Surgical ICU
- ☐ Neuro-ICU
- ☐ Cardiac/Cardiothoracic ICU
- ☐ Paediatric ICU
- ☐ Mixed ICU (any 2 or more of the above including if you are working in different units)

\* 9. How you describe your clinical and teaching/Continuous Professional development (CPD) ICM time?

- ☐ Full-time (36 hours or more per week)
- ☐ Part-time (less than 36 hours per week)

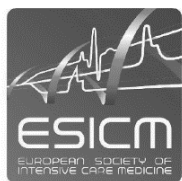

*The Intensive Connection*

## PRACT-INF-ICU

### Management of infections in your ICU

\* 10. On a scale of 5, how you describe your knowledge about the microbiological diagnostic capabilities in your hospital?

(This includes the range of microbiologic tests available)

1= Poor 5= Very good

0 5

☐ ☐ ☐ ☐ ☐

\* 11. When deciding upon initial antimicrobial treatment for ICU patients; Which of the following specialties are involved (can select more than one): (Multiple answers allowed)

- ☐ Infectious diseases doctors
- ☐ Microbiologists
- ☐ Pharmacists
- ☐ Intensivists
- ☐ Other (please specify)

\* 12. The initial antimicrobial decision in your ICU, is most likely based on:

- ☐ National/International guidelines
- ☐ Local protocols
- ☐ Software application (not guidelines based)
- ☐ Expert opinion by non-ICU specialties (Infectious diseases, pharmacists, Microbiologists)
- ☐ Senior ICU opinion (Consultant)
- ☐ Junior ICU opinion (Specialist or junior trainees)

\* 13. In your unit, is an expert antimicrobial opinion available within 1 hour?

- ☐ Yes, by senior ICU doctors
- ☐ Yes, by non-ICU expert (Infectious disease, microbiologist or pharmacist)
- ☐ No (or based on protocols/guidelines)

\* 14. On the initiation of antimicrobial treatment, how frequently non-ICU opinion is sought: (Single answer)

- ☐ More than 90% of cases.
- ☐ In most cases (50 - 90 % of cases)
- ☐ In 25-50% of cases
- ☐ Rarely or in selected cases (<25%)
- ☐ Never (0%)

\* 15. How frequently do you have infectious diseases/Microbiologists round per week?

- ☐ None or only on request
- ☐ Once per week
- ☐ 2-3 times per week
- ☐ 4-5 times per week
- ☐ 7 days a week

\* 16. An expert non-ICU opinion is most likely required in which of the following patients' groups? (Can select one or more) (Multiple answers allowed)

- |                                                                         |                                         |
|-------------------------------------------------------------------------|-----------------------------------------|
| <input type="checkbox"/> Immunocompromised patients/Neutropenic sepsis. | <input type="checkbox"/> All equal      |
| <input type="checkbox"/> Septic shock patients                          | <input type="checkbox"/> Never required |
| <input type="checkbox"/> Burn patients                                  |                                         |
| <input type="checkbox"/> Other (please specify)                         |                                         |

\* 17. An expert non-ICU opinion is most likely required in which of the following patient groups? (Can select one or more) (Multiple answers allowed)

- ☐ Respiratory tract infection
- ☐ Urosepsis
- ☐ Abdominal sepsis (excluding urosepsis)
- ☐ Post-operative or surgical site infection
- ☐ Blood stream infection
- ☐ Non- surgical Soft tissue infection including necrotizing fasciitis
- ☐ Central nervous system infection
- ☐ Other (please specify)

\* 18. Based on micro-organisms and/or resistance pattern, is there a specific group your ICU team is less confident to manage and more likely to ask for non-ICU expert opinion? (Can select one or more)

\* MDR was defined as acquired nonsusceptibility to at least one agent in three or more antimicrobial categories, XDR was defined as nonsusceptibility to at least one agent in all but two or fewer antimicrobial categories (i.e. bacterial isolates remain susceptible to only one or two categories) PDR was defined as non-susceptibility to all agents in all antimicrobial categories (Magiorakos AP, Srinivasan A, Carey RB et al. Multidrug-resistant, extensively drug-resistant and pandrug-resistant bacteria: an international expert proposal for interim standard definitions for acquired resistance. Clin Microbiol Infect Dis, 18: 268-281)

- ☐ All equal
- ☐ Any multidrug resistant (MDR)
- ☐ Extended resistant organism (XDR)
- ☐ Pan-resistant organisms (PDR)
- ☐ Fungal infection
- ☐ Viral infection
- ☐ None
- ☐ Other (please specify)



\* 19. At which point you feel you need most of the non-ICU expertise: (Can select one or more)

- ☐ Initiation of Antibiotics
- ☐ 48/72 hours review
- ☐ To adjust according to culture results
- ☐ Shifting from intravenous to oral
- ☐ On discontinuation
- ☐ Never required

\* 20. Do you have an antimicrobial Stewardship policy in place in your ICU?

\*Please note that If you implement Selective decontamination of the digestive tract (SDD) program, the answer should be yes

- ☐ Yes
- ☐ No
- ☐ I do not know

\* 21. Do you think the current level of knowledge and training in intensive care infectious diseases in the country you are practicing is adequate?

| Strongly Agree        | Agree                 | Neither               | Disagree              | Strongly Disagree     |
|-----------------------|-----------------------|-----------------------|-----------------------|-----------------------|
| <input type="radio"/> |

\* 22. Do you think there is a need to improve the training in infectious diseases for Intensive Care doctors?

| Strongly Agree        | Agree                 | Neither               | Disagree              | Strongly Disagree     |
|-----------------------|-----------------------|-----------------------|-----------------------|-----------------------|
| <input type="radio"/> |

23. If you selected "strongly agree" or "agree" in question 22: How do you think more training will impact the service in your unit? (Can select one or more)

- ☐ Improve patients' outcome.
- ☐ Decrease cost.
- ☐ Decrease antimicrobial resistance.
- ☐ Save effort and/or time
- ☐ Sole responsibility will improve communication with patients and relatives
- ☐ Other (please specify)

\* 24. Do you think medicolegal issues and defensive medicine are impacting antimicrobial prescription?

| Strongly agree        | Agree                 | Neither               | Disagree              | Strongly Disagree     |
|-----------------------|-----------------------|-----------------------|-----------------------|-----------------------|
| <input type="radio"/> |

25. If you answered "strongly agree" or "agree" in question 24. In your opinion, by which mean medicolegal issues and defensive medicine are affecting antimicrobial prescription? (Can select more than one)

- ☐ Lower threshold to prescribe antibiotics.
- ☐ More antibiotic combinations.
- ☐ Longer course.
- ☐ Less frequent de-escalation.
- ☐ Seeking non-ICU expertise.
- ☐ Other (please specify)

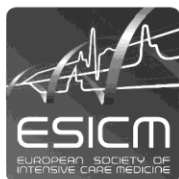

*The Intensive Connection*

PRACT-INF-ICU

Additional comment

26. Please add any additional comment or information you feel will be of benefit about the subject. (Free text)

## eAppendix 2: Checklist for Reporting Results of Internet E-Surveys (CHERRIES)

| Checklist Item                          | Explanation                                                                                                                                                                                                                                                                                                                                                                                                                                  | Page Number |
|-----------------------------------------|----------------------------------------------------------------------------------------------------------------------------------------------------------------------------------------------------------------------------------------------------------------------------------------------------------------------------------------------------------------------------------------------------------------------------------------------|-------------|
| <b>Describe survey design</b>           | Describe target population, sample frame. Is the sample a convenience sample? (In “open” surveys this is most likely.)                                                                                                                                                                                                                                                                                                                       | 4 & 5       |
| <b>IRB approval</b>                     | Mention whether the study has been approved by an IRB.                                                                                                                                                                                                                                                                                                                                                                                       | 5           |
| <b>Informed consent</b>                 | Describe the informed consent process. Where were the participants told the length of time of the survey, which data were stored and where and for how long, who the investigator was, and the purpose of the study?                                                                                                                                                                                                                         | 5           |
| <b>Data protection</b>                  | If any personal information was collected or stored, describe what mechanisms were used to protect unauthorized access.                                                                                                                                                                                                                                                                                                                      | 5           |
| <b>Development and testing</b>          | State how the survey was developed, including whether the usability and technical functionality of the electronic questionnaire had been tested before fielding the questionnaire.                                                                                                                                                                                                                                                           | 5           |
| <b>Open survey versus closed survey</b> | An “open survey” is a survey open for each visitor of a site, while a closed survey is only open to a sample which the investigator knows (password-protected survey).                                                                                                                                                                                                                                                                       | 4           |
| <b>Contact mode</b>                     | Indicate whether or not the initial contact with the potential participants was made on the Internet. (Investigators may also send out questionnaires by mail and allow for Web-based data entry.)                                                                                                                                                                                                                                           | 4           |
| <b>Advertising the survey</b>           | How/where was the survey announced or advertised? Some examples are offline media (newspapers), or online (mailing lists - If yes, which ones?) or banner ads (Where were these banner ads posted and what did they look like?). It is important to know the wording of the announcement as it will heavily influence who chooses to participate. Ideally the survey announcement should be published as an appendix.                        | 5           |
| <b>Web/E-mail</b>                       | State the type of e-survey (e.g., one posted on a Web site, or one sent out through e-mail). If it is an e-mail survey, were the responses entered manually into a database, or was there an automatic method for capturing responses?                                                                                                                                                                                                       | 5           |
| <b>Context</b>                          | Describe the Web site (for mailing list/newsgroup) in which the survey was posted. What is the Web site about, who is visiting it, what are visitors normally looking for? Discuss to what degree the content of the Web site could pre-select the sample or influence the results. For example, a survey about vaccination on a anti-immunization Web site will have different results from a Web survey conducted on a government Web site | 5           |
| <b>Mandatory/voluntary</b>              | Was it a mandatory survey to be filled in by every visitor who wanted to enter the Web site, or was it a voluntary survey?                                                                                                                                                                                                                                                                                                                   | 5           |
| <b>Incentives</b>                       | Were any incentives offered (e.g., monetary, prizes, or non-monetary incentives such as an offer to provide the survey results)?                                                                                                                                                                                                                                                                                                             | 5           |
| <b>Time/Date</b>                        | In what timeframe were the data collected?                                                                                                                                                                                                                                                                                                                                                                                                   | 5           |

| Checklist Item                                                                                                   | Explanation                                                                                                                                                                                                                                                                                                                                                                                                                                                                                                                    | Page Number |
|------------------------------------------------------------------------------------------------------------------|--------------------------------------------------------------------------------------------------------------------------------------------------------------------------------------------------------------------------------------------------------------------------------------------------------------------------------------------------------------------------------------------------------------------------------------------------------------------------------------------------------------------------------|-------------|
| <b>Randomization of items or questionnaires</b>                                                                  | To prevent biases items can be randomized or alternated.                                                                                                                                                                                                                                                                                                                                                                                                                                                                       | NR          |
| <b>Adaptive questioning</b>                                                                                      | Use adaptive questioning (certain items, or only conditionally displayed based on responses to other items) to reduce number and complexity of the questions.                                                                                                                                                                                                                                                                                                                                                                  | 5           |
| <b>Number of Items</b>                                                                                           | What was the number of questionnaire items per page? The number of items is an important factor for the completion rate.                                                                                                                                                                                                                                                                                                                                                                                                       | 5           |
| <b>Number of screens (pages)</b>                                                                                 | Over how many pages was the questionnaire distributed? The number of items is an important factor for the completion rate.                                                                                                                                                                                                                                                                                                                                                                                                     | 5           |
| <b>Completeness check</b>                                                                                        | It is technically possible to do consistency or completeness checks before the questionnaire is submitted. Was this done, and if “yes”, how (usually JavaScript)? An alternative is to check for completeness after the questionnaire has been submitted (and highlight mandatory items). If this has been done, it should be reported. All items should provide a non-response option such as “not applicable” or “rather not say”, and selection of one response option should be enforced.                                  | 5           |
| <b>Review step</b>                                                                                               | State whether respondents were able to review and change their answers (e.g., through a Back button or a Review step which displays a summary of the responses and asks the respondents if they are correct).                                                                                                                                                                                                                                                                                                                  | 5           |
| <b>Unique site visitor</b>                                                                                       | If you provide view rates or participation rates, you need to define how you determined a unique visitor. There are different techniques available, based on IP addresses or cookies or both.                                                                                                                                                                                                                                                                                                                                  | NR          |
| <b>View rate</b> (Ratio of unique survey visitors/unique site visitors)                                          | Requires counting unique visitors to the first page of the survey, divided by the number of unique site visitors (not page views!). It is not unusual to have view rates of less than 0.1 % if the survey is voluntary.                                                                                                                                                                                                                                                                                                        | NR          |
| <b>Participation rate</b> (Ratio of unique visitors who agreed to participate/unique first survey page visitors) | Count the unique number of people who filled in the first survey page (or agreed to participate, for example by checking a checkbox), divided by visitors who visit the first page of the survey (or the informed consents page, if present). This can also be called “recruitment” rate.                                                                                                                                                                                                                                      | 6           |
| <b>Completion rate</b> (Ratio of users who finished the survey/users who agreed to participate)                  | The number of people submitting the last questionnaire page, divided by the number of people who agreed to participate (or submitted the first survey page). This is only relevant if there is a separate “informed consent” page or if the survey goes over several pages. This is a measure for attrition. Note that “completion” can involve leaving questionnaire items blank. This is not a measure for how completely questionnaires were filled in. (If you need a measure for this, use the word “completeness rate”.) | 6           |
| <b>Cookies used</b>                                                                                              | Indicate whether cookies were used to assign a unique user identifier to each client computer. If so, mention the page on which the cookie was set and read, and how long the cookie was valid. Were duplicate entries avoided by preventing users access to the survey twice; or were duplicate                                                                                                                                                                                                                               | 5           |

| Checklist Item                                             | Explanation                                                                                                                                                                                                                                                                                                                                                                                                                                                                                                                                                                | Page Number |
|------------------------------------------------------------|----------------------------------------------------------------------------------------------------------------------------------------------------------------------------------------------------------------------------------------------------------------------------------------------------------------------------------------------------------------------------------------------------------------------------------------------------------------------------------------------------------------------------------------------------------------------------|-------------|
|                                                            | database entries having the same user ID eliminated before analysis? In the latter case, which entries were kept for analysis (eg, the first entry or the most recent)?                                                                                                                                                                                                                                                                                                                                                                                                    |             |
| <b>IP check</b>                                            | Indicate whether the IP address of the client computer was used to identify potential duplicate entries from the same user. If so, mention the period of time for which no two entries from the same IP address were allowed (eg, 24 hours). Were duplicate entries avoided by preventing users with the same IP address access to the survey twice; or were duplicate database entries having the same IP address within a given period of time eliminated before analysis? If the latter, which entries were kept for analysis (eg, the first entry or the most recent)? | 5           |
| <b>Log file analysis</b>                                   | Indicate whether other techniques to analyze the log file for identification of multiple entries were used. If so, please describe.                                                                                                                                                                                                                                                                                                                                                                                                                                        | 5           |
| <b>Registration</b>                                        | In “closed” (non-open) surveys, users need to login first and it is easier to prevent duplicate entries from the same user. Describe how this was done. For example, was the survey never displayed a second time once the user had filled it in, or was the username stored together with the survey results and later eliminated? If the latter, which entries were kept for analysis (e.g., the first entry or the most recent)?                                                                                                                                        | NA          |
| <b>Handling of incomplete questionnaires</b>               | Were only completed questionnaires analyzed? Were questionnaires which terminated early (where, for example, users did not go through all questionnaire pages) also analyzed?                                                                                                                                                                                                                                                                                                                                                                                              | 6           |
| <b>Questionnaires submitted with an atypical timestamp</b> | Some investigators may measure the time people needed to fill in a questionnaire and exclude questionnaires that were submitted too soon. Specify the timeframe that was used as a cut-off point, and describe how this point was determined.                                                                                                                                                                                                                                                                                                                              | NA          |
| <b>Statistical correction</b>                              | Indicate whether any methods such as weighting of items or propensity scores have been used to adjust for the non-representative sample; if so, please describe the methods.                                                                                                                                                                                                                                                                                                                                                                                               | NA          |

NR, not reported; NA, not applicable.

## Figures:

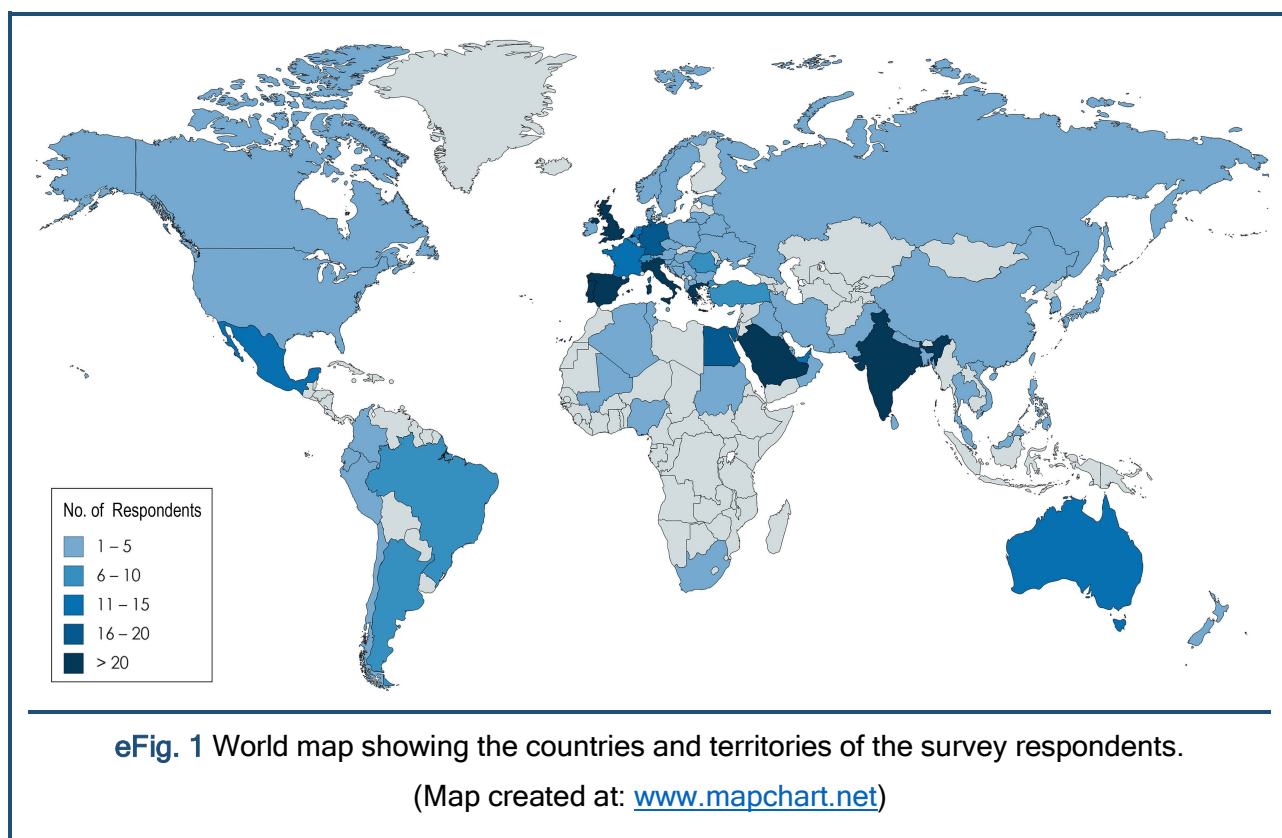

## Tables:

**eTable 1** Characteristics of Respondents who did and did Not Complete the Survey

| Characteristic                    | Completed Survey<br>(N=466) | Did Not Complete Survey<br>(N=91)* | P     |
|-----------------------------------|-----------------------------|------------------------------------|-------|
| Continent, n (%)                  |                             |                                    |       |
| Africa                            | 28 (6)                      | 11 (12.1)                          | 0.004 |
| Asia                              | 107 (23)                    | 35 (38.5)                          |       |
| Europe                            | 274 (58.8)                  | 37 (40.7)                          |       |
| North America                     | 16 (3.4)                    | 3 (3.3)                            |       |
| Oceania                           | 16 (3.4)                    | 1 (1.1)                            |       |
| South America                     | 25 (5.4)                    | 4 (4.4)                            |       |
| Income Class, n (%)               |                             |                                    |       |
| HICs                              | 306 (65.7)                  | 48 (52.7)                          | 0.023 |
| LMICs                             | 160 (34.3)                  | 43 (47.3)                          |       |
| Years of practice, median (IQR)   | 10 (5 - 19)                 | 7 (4 - 12)                         | 0.001 |
| ESICM membership, n (%)           |                             |                                    |       |
| Member of ESICM                   | 309 (66.3)                  | 42 (46.2)                          | 0.003 |
| Member of infection section       | 181 (38.8)                  | 21 (23.1)                          |       |
| Not a member of infection section | 128 (27.5)                  | 21 (23.1)                          |       |
| Not a member of ESICM             | 157 (33.7)                  | 49 (53.8)                          |       |
| Background Training, n (%)        |                             |                                    |       |
| Critical Care as sole specialty   | 141 (30.3)                  | 30 (33)                            | 0.170 |
| Anaesthesia & Critical Care       | 166 (35.6)                  | 40 (44)                            |       |
| Medicine & Critical Care          | 142 (30.5)                  | 20 (22)                            |       |
| Other                             | 17 (3.6)                    | 1 (1.1)                            |       |
| ICU time, n (%)                   |                             |                                    |       |
| Full time                         | 356 (76.4)                  | 59 (64.3)                          | 0.168 |
| Part time                         | 110 (23.6)                  | 11 (15.7)                          |       |



| Characteristic               | Completed Survey<br>(N=466) | Did Not Complete Survey<br>(N=91)* | P     |
|------------------------------|-----------------------------|------------------------------------|-------|
| Hospital type, n (%)         |                             |                                    |       |
| University/teaching hospital | 295 (63.3)                  | 41 (58.6)                          | 0.712 |
| Public non-teaching hospital | 92 (19.7)                   | 14 (20)                            |       |
| Private hospital             | 77 (16.5)                   | 15 (21.4)                          |       |
| Other                        | 2 (0.4)                     | 0 (0)                              |       |
| Hospital beds, n (%)         |                             |                                    |       |
| < 200                        | 64 (13.7)                   | 15 (21.4)                          | 0.195 |
| 200-499                      | 187 (40.1)                  | 31 (44.3)                          |       |
| 500-999                      | 136 (29.2)                  | 16 (22.9)                          |       |
| > 1000                       | 79 (17)                     | 8 (11.4)                           |       |
| ICU beds, n (%)              |                             |                                    |       |
| ≤ 10 beds                    | 91 (19.5)                   | 18 (25.7)                          | 0.233 |
| 11-15                        | 65 (13.9)                   | 8 (11.4)                           |       |
| 16-20                        | 67 (14.4)                   | 6 (8.6)                            |       |
| 21-24                        | 49 (10.5)                   | 12 (17.1)                          |       |
| >24                          | 194 (41.6)                  | 26 (37.1)                          |       |
| ICU specialty, n (%)         |                             |                                    |       |
| Medical ICU                  | 55 (11.8)                   | 10 (14.3)                          | 0.827 |
| Surgical ICU                 | 27 (5.8)                    | 3 (4.3)                            |       |
| Neuro-ICU                    | 6 (1.3)                     | 2 (2.8)                            |       |
| Cardiac/Cardiothoracic ICU   | 13 (2.8)                    | 3 (4.3)                            |       |
| Paediatric ICU               | 8 (1.7)                     | 1 (1.4)                            |       |
| Mixed ICU                    | 357 (76.6)                  | 51 (72.9)                          |       |

(\*) 70 respondents completed pages 1& 2 (questions 1-9) and 21 respondents completed page 1 (questions 1-4) only.

HICs, High-Income Countries; LMICs, Low- and Middle-Income Countries; IQR, Interquartile Range; ESICM, European Society of Intensive Care Medicine; ICU, Intensive Care Unit.

**eTable 2** Knowledge about hospitals' microbiological diagnostic capabilities

|               | All<br>(N=466) | Income Class                                                                                                         |                  |         | Background Training              |                                          |                                        |       | Practice Years       |                      |         |
|---------------|----------------|----------------------------------------------------------------------------------------------------------------------|------------------|---------|----------------------------------|------------------------------------------|----------------------------------------|-------|----------------------|----------------------|---------|
|               |                | HICs<br>(N=306)                                                                                                      | LMICs<br>(N=160) | P       | Critical Care<br>Only<br>(N=141) | Anesthesia &<br>Critical Care<br>(N=166) | Medicine &<br>Critical Care<br>(N=142) | P     | ≤10 years<br>(N=246) | >10 years<br>(N=220) | P       |
|               |                | On a scale of 5, how you describe your knowledge about the microbiological diagnostic capabilities of your hospital? |                  |         |                                  |                                          |                                        |       |                      |                      |         |
| 1 (Poor)      | 4 (0.9)        | 1 (0.3)                                                                                                              | 3 (1.9)          |         | 0 (0)                            | 3 (1.8)                                  | 1 (0.7)                                |       | 3 (1.2)              | 1 (0.5)              |         |
| 2             | 31 (6.7)       | 9 (2.9)                                                                                                              | 22 (13.8)        |         | 10 (7.1)                         | 15 (9)                                   | 4 (2.8)                                |       | 22 (8.9)             | 9 (4.1)              |         |
| 3             | 123 (26.4)     | 47 (24.2)                                                                                                            | 49 (30.6)        | < 0.001 | 45 (31.9)                        | 43 (25.9)                                | 31 (21.8)                              | 0.026 | 81 (32.9)            | 42 (19.1)            | < 0.001 |
| 4             | 187 (40.1)     | 126 (41.2)                                                                                                           | 61 (38.1)        |         | 47 (33.3)                        | 73 (44)                                  | 62 (43.7)                              |       | 94 (38.2)            | 93 (42.3)            |         |
| 5 (Very Good) | 121 (26)       | 96 (31.4)                                                                                                            | 25 (15.6)        |         | 39 (27.7)                        | 32 (19.3)                                | 44 (31)                                |       | 46 (18.7)            | 75 (34.1)            |         |

HICs, High-Income Countries; LMICs, Low- and Middle-Income Countries.

eTable 3 Initial antimicrobial therapy (AMT) decision

|                                                                   | All<br>(N=466) | Income Class    |                  |         | Background Training              |                                          |                                        |       | Practice Years       |                      |         |
|-------------------------------------------------------------------|----------------|-----------------|------------------|---------|----------------------------------|------------------------------------------|----------------------------------------|-------|----------------------|----------------------|---------|
|                                                                   |                | HICs<br>(N=306) | LMICs<br>(N=160) | P       | Critical Care<br>Only<br>(N=141) | Anesthesia &<br>Critical Care<br>(N=166) | Medicine &<br>Critical Care<br>(N=142) | P     | ≤10 years<br>(N=246) | >10 years<br>(N=220) | P       |
| The initial AMT decision is most likely based on                  |                |                 |                  |         |                                  |                                          |                                        |       |                      |                      |         |
| National/International guidelines                                 | 178 (38.2)     | 123 (40.2)      | 55 (34.4)        | 0.316   | 47 (33.3)                        | 71 (42.8)                                | 53 (37.3)                              | 0.040 | 95 (38.6)            | 83 (37.7)            | 0.333   |
| Local protocols                                                   | 142 (30.5)     | 86 (28.1)       | 56 (35)          |         | 40 (28.4)                        | 51 (20.7)                                | 45 (31.7)                              |       | 78 (31.7)            | 64 (29.1)            |         |
| Expert non-ICU opinion                                            | 20 (4.3)       | 11 (3.6)        | 9 (5.6)          |         | 13 (9.2)                         | 2 (1.2)                                  | 4 (2.8)                                |       | 11 (4.5)             | 9 (4.1)              |         |
| Senior ICU opinion                                                | 109 (23.4)     | 76 (24.8)       | 33 (20.6)        |         | 34 (24.1)                        | 38 (22.9)                                | 35 (24.6)                              |       | 50 (20.3)            | 59 (26.8)            |         |
| Junior ICU opinion                                                | 17 (3.6)       | 10 (3.3)        | 7 (4.4)          |         | 7 (5)                            | 4 (2.4)                                  | 5 (3.5)                                |       | 12 (4.9)             | 5 (2.3)              |         |
| Expert antimicrobial opinion available within 1 hour              |                |                 |                  |         |                                  |                                          |                                        |       |                      |                      |         |
| Yes (by senior ICU doctors)                                       | 266 (57.1)     | 183 (59.8)      | 83 (51.9)        | < 0.001 | 88 (52.4)                        | 87 (52.4)                                | 83 (58.5)                              | 0.189 | 116 (47.2)           | 150 (68.2)           | < 0.001 |
| Yes (by non-ICU expert)                                           | 120 (25.8)     | 87 (28.4)       | 33 (20.6)        |         | 27 (19.1)                        | 52 (31.3)                                | 37 (26.1)                              |       | 79 (32.1)            | 41 (18.6)            |         |
| No                                                                | 80 (17.2)      | 36 (11.8)       | 44 (27.5)        |         | 26 (18.4)                        | 27 (16.3)                                | 22 (15.5)                              |       | 51 (20.7)            | 29 (13.2)            |         |
| How frequently non-ICU opinion is sought on the initiation of AMT |                |                 |                  |         |                                  |                                          |                                        |       |                      |                      |         |
| More than 90% of cases                                            | 21 (4.5)       | 12 (3.9)        | 9 (5.6)          | 0.588   | 9 (6.4)                          | 4 (2.4)                                  | 7 (4.9)                                | 0.720 | 13 (5.3)             | 8 (3.6)              | 0.022   |
| 50 - 90 % of cases                                                | 83 (17.8)      | 51 (16.7)       | 32 (20)          |         | 21 (14.9)                        | 32 (19.3)                                | 23 (16.2)                              |       | 52 (21.1)            | 31 (14.1)            |         |
| In 25-50% of cases                                                | 101 (21.7)     | 71 (23.2)       | 30 (18.8)        |         | 28 (19.9)                        | 43 (25.9)                                | 30 (21.1)                              |       | 59 (24)              | 42 (19.1)            |         |
| <25%                                                              | 231 (49.6)     | 154 (50.3)      | 77 (48.1)        |         | 70 (49.6)                        | 78 (47)                                  | 75 (52.8)                              |       | 112 (54.5)           | 119 (54.1)           |         |
| Never (0%)                                                        | 30 (6.4)       | 18 (5.9)        | 12 (7.5)         |         | 13 (9.2)                         | 9 (5.4)                                  | 7 (4.9)                                |       | 10 (4.1)             | 20 (9.1)             |         |

# PRACT-INF-ICU (Supplementary Material)

## Tables

|                                              | All<br>(N=466) | Income Class    |                  |              | Background Training              |                                          |                                        |       | Practice Years       |                      |       |
|----------------------------------------------|----------------|-----------------|------------------|--------------|----------------------------------|------------------------------------------|----------------------------------------|-------|----------------------|----------------------|-------|
|                                              |                | HICs<br>(N=306) | LMICs<br>(N=160) | P            | Critical Care<br>Only<br>(N=141) | Anesthesia &<br>Critical Care<br>(N=166) | Medicine &<br>Critical Care<br>(N=142) | P     | ≤10 years<br>(N=246) | >10 years<br>(N=220) | P     |
| Specialties involved in initial AMT decision |                |                 |                  |              |                                  |                                          |                                        |       |                      |                      |       |
| Infectious diseases doctors                  | 163 (35)       | 107 (35)        | 56 (35)          | 1            | 51 (36.2)                        | 56 (33.7)                                | 47 (33.1)                              | 0.846 | 86 (35)              | 77 (35)              | 1     |
| Microbiologists                              | 158 (33.9)     | 118 (38.6)      | 40 (25)          | <b>0.004</b> | 42 (29.8)                        | 61 (36.7)                                | 48 (33.8)                              | 0.437 | 84 (34.1)            | 74 (33.6)            | 0.922 |
| Pharmacists                                  | 82 (17.6)      | 48 (15.7)       | 34 (21.3)        | 0.159        | 32 (22.7)                        | 25 (15.1)                                | 21 (14.8)                              | 0.131 | 50 (20.3)            | 32 (14.5)            | 0.114 |
| Intensivists                                 | 450 (96.6)     | 398 (97.4)      | 152 (95)         | 0.189        | 136 (96.5)                       | 161 (97)                                 | 137 (96.5)                             | 0.957 | 236 (95.6)           | 214 (97.3)           | 0.458 |
| Other                                        | 27 (5.8)       | 14 (4.6)        | 13 (8.1)         | 0.144        | 6 (4.3)                          | 11 (6.6)                                 | 7 (4.9)                                | 0.632 | 14 (5.7)             | 13 (5.9)             | 1     |

HICs, High-Income Countries; LMICs, Low- and Middle-Income Countries; ICU; Intensive Care Unit.

**eTable 4** Infectious diseases/microbiologists rounds & antimicrobial stewardship

|                                                                  | All<br>(N=466) | Income Class    |                  |                                  | P         | Background Training                      |                                        |       |                      | P          | Practice Years       |   |  |
|------------------------------------------------------------------|----------------|-----------------|------------------|----------------------------------|-----------|------------------------------------------|----------------------------------------|-------|----------------------|------------|----------------------|---|--|
|                                                                  |                | HICs<br>(N=306) | LMICs<br>(N=160) | Critical Care<br>Only<br>(N=141) |           | Anesthesia &<br>Critical Care<br>(N=166) | Medicine &<br>Critical Care<br>(N=142) | P     | ≤10 years<br>(N=246) |            | >10 years<br>(N=220) | P |  |
| Frequency of infectious diseases/microbiologists rounds per week |                |                 |                  |                                  |           |                                          |                                        |       |                      |            |                      |   |  |
| None or only on request                                          | 184 (39.5)     | 116 (37.9)      | 68 (42.5)        |                                  | 49 (34.8) | 66 (39.8)                                | 62 (43.7)                              |       | 99 (40.2)            | 85 (38.6)  |                      |   |  |
| Once per week                                                    | 88 (18.9)      | 59 (19.3)       | 29 (18.1)        |                                  | 24 (17)   | 37 (22.3)                                | 23 (16.2)                              |       | 44 (17.9)            | 44 (20)    |                      |   |  |
| 2-3 times per week                                               | 83 (17.8)      | 53 (17.3)       | 30 (18.8)        | 0.367                            | 27 (19.1) | 34 (20.5)                                | 22 (15.5)                              | 0.130 | 44 (17.9)            | 39 (17.7)  | 0.966                |   |  |
| 4-5 times per week                                               | 75 (16.1)      | 49 (16)         | 26 (16.3)        |                                  | 29 (20.6) | 19 (11.4)                                | 23 (16.2)                              |       | 41 (16.7)            | 34 (15.5)  |                      |   |  |
| 7 days a week                                                    | 36 (7.7)       | 29 (9.5)        | 7 (4.4)          |                                  | 12 (8.5)  | 10 (6)                                   | 12 (8.5)                               |       | 18 (7.3)             | 18 (8.2)   |                      |   |  |
| Do you have an antimicrobial stewardship policy in your ICU?     |                |                 |                  |                                  |           |                                          |                                        |       |                      |            |                      |   |  |
| Yes                                                              | 306 (65.7)     | 207 (67.6)      | 99 (61.9)        |                                  | 97 (68.8) | 99 (59.6)                                | 95 (66.9)                              |       | 148 (60.2)           | 158 (71.8) |                      |   |  |
| No                                                               | 131 (28.1)     | 75 (24.5)       | 56 (35)          | 0.015                            | 35 (24.8) | 52 (31.1)                                | 43 (30.3)                              | 0.130 | 73 (29.7)            | 58 (26.4)  | < 0.001              |   |  |
| I don't know                                                     | 29 (6.2)       | 24 (7.8)        | 5 (3.1)          |                                  | 9 (6.4)   | 15 (9)                                   | 4 (2.8)                                |       | 25 (10.2)            | 4 (1.8)    |                      |   |  |

HICs, High-Income Countries; LMICs, Low- and Middle-Income Countries; ICU; Intensive Care Unit.

**eTable 5** Perceptions regarding seeking non-ICU expertise

|                                                                       | All<br>(N=466) | Income Class    |                  |              | Background Training              |                                          |                                        |                   | Practice Years       |                      |                   |
|-----------------------------------------------------------------------|----------------|-----------------|------------------|--------------|----------------------------------|------------------------------------------|----------------------------------------|-------------------|----------------------|----------------------|-------------------|
|                                                                       |                | HICs<br>(N=306) | LMICs<br>(N=160) | P            | Critical Care<br>Only<br>(N=141) | Anesthesia &<br>Critical Care<br>(N=166) | Medicine &<br>Critical Care<br>(N=142) | P                 | ≤10 years<br>(N=246) | >10 years<br>(N=220) | P                 |
|                                                                       |                |                 |                  |              |                                  |                                          |                                        |                   |                      |                      |                   |
| At which point you feel you need most of the non-ICU expertise        |                |                 |                  |              |                                  |                                          |                                        |                   |                      |                      |                   |
| Initiation of Antibiotics                                             | 74 (15.9)      | 43 (14.1)       | 31 (19.4)        | 0.144        | 20 (14.2)                        | 23 (13.9)                                | 23 (16.2)                              | 0.828             | 44 (17.9)            | 30 (13.6)            | 0.253             |
| 48/72 hours review                                                    | 150 (32.2)     | 104 (34)        | 46 (28.8)        | 0.296        | 43 (30.5)                        | 64 (38.6)                                | 39 (27.5)                              | 0.097             | 89 (36.2)            | 61 (27.7)            | 0.059             |
| To adjust according to culture                                        | 182 (39.1)     | 119 (38.9)      | 63 (39.4)        | 0.921        | 52 (36.9)                        | 66 (39.8)                                | 54 (38)                                | 0.872             | 109 (44.3)           | 73 (33.2)            | <b>0.017</b>      |
| Shifting from intravenous to oral                                     | 54 (11.6)      | 35 (11.4)       | 19 (11.9)        | 0.880        | 20 (14.2)                        | 20 (12)                                  | 11 (7.7)                               | 0.219             | 38 (15.4)            | 16 (7.3)             | <b>0.006</b>      |
| On discontinuation                                                    | 96 (20.6)      | 63 (20.6)       | 33 (20.6)        | 1            | 19 (13.5)                        | 47 (28.3)                                | 24 (16.9)                              | <b>0.003</b>      | 63 (25.6)            | 33 (15)              | <b>0.006</b>      |
| Never required                                                        | 94 (20.2)      | 62 (20.3)       | 32 (20)          | 1            | 36 (25.5)                        | 18 (10.8)                                | 37 (26.1)                              | <b>0.001</b>      | 31 (12.6)            | 63 (28.6)            | <b>&lt; 0.001</b> |
| Expert non-ICU opinion is most likely required in (patient group)     |                |                 |                  |              |                                  |                                          |                                        |                   |                      |                      |                   |
| Immunocompromised patients                                            | 295 (63.3)     | 200 (65.4)      | 95 (59.4)        | 0.225        | 80 (56.7)                        | 128 (77.1)                               | 79 (55.6)                              | <b>&lt; 0.001</b> | 152 (61.8)           | 143 (65)             | 0.501             |
| Septic shock patients                                                 | 108 (23.2)     | 63 (20.6)       | 45 (28.1)        | 0.083        | 33 (23.4)                        | 52 (31.3)                                | 18 (12.7)                              | <b>0.001</b>      | 65 (26.4)            | 43 (19.5)            | 0.099             |
| Burn patients                                                         | 45 (9.7)       | 25 (8.2)        | 20 (12.5)        | 0.140        | 10 (7.1)                         | 20 (12)                                  | 13 (9.2)                               | 0.332             | 27 (11)              | 18 (8.2)             | 0.348             |
| Other                                                                 | 68 (14.6)      | 54 (17.6)       | 14 (8.8)         | <b>0.012</b> | 19 (13.5)                        | 27 (16.3)                                | 19 (13.4)                              | 0.711             | 29 (11.8)            | 39 (17.7)            | 0.087             |
| All equal                                                             | 97 (20.8)      | 58 (19)         | 39 (24.4)        | 0.187        | 35 (24.8)                        | 24 (14.5)                                | 32 (22.5)                              | 0.057             | 67 (27.2)            | 30 (13.6)            | <b>&lt; 0.001</b> |
| Never required                                                        | 39 (8.4)       | 25 (8.2)        | 14 (8.8)         | 0.861        | 15 (10.6)                        | 5 (3)                                    | 19 (13.4)                              | <b>0.003</b>      | 15 (6.1)             | 24 (10.9)            | 0.067             |
| Expert non-ICU opinion is most likely required in (site of infection) |                |                 |                  |              |                                  |                                          |                                        |                   |                      |                      |                   |
| Respiratory tract infection                                           | 131 (28.1)     | 70 (22.9)       | 61 (38.1)        | <b>0.001</b> | 47 (33.3)                        | 42 (52.3)                                | 37 (26.1)                              | 0.240             | 84 (34.1)            | 47 (21.4)            | <b>0.003</b>      |

|                                                              | All<br>(N=466) | Income Class    |                  |              | Background Training              |                                          |                                        |                   | Practice Years       |                      |                   |
|--------------------------------------------------------------|----------------|-----------------|------------------|--------------|----------------------------------|------------------------------------------|----------------------------------------|-------------------|----------------------|----------------------|-------------------|
|                                                              |                | HICs<br>(N=306) | LMICs<br>(N=160) | P            | Critical Care<br>Only<br>(N=141) | Anesthesia &<br>Critical Care<br>(N=166) | Medicine &<br>Critical Care<br>(N=142) | P                 | ≤10 years<br>(N=246) | >10 years<br>(N=220) | P                 |
| Urosepsis                                                    | 63 (13.5)      | 35 (11.4)       | 28 (17.5)        | 0.086        | 19 (13.5)                        | 21 (12.7)                                | 19 (13.4)                              | 0.972             | 39 (15.9)            | 24 (10.9)            | 0.136             |
| Abdominal sepsis                                             | 161 (34.5)     | 97 (31.7)       | 64 (40)          | 0.081        | 50 (35.5)                        | 57 (34.3)                                | 45 (31.7)                              | 0.788             | 97 (39.4)            | 64 (29.1)            | <b>0.020</b>      |
| Post-operative or SSI                                        | 151 (32.4)     | 89 (29.1)       | 62 (38.8)        | <b>0.037</b> | 47 (33.3)                        | 52 (31.3)                                | 45 (31.7)                              | 0.925             | 91 (37)              | 60 (27.3)            | <b>0.029</b>      |
| Blood stream infection                                       | 156 (33.5)     | 98 (32)         | 58 (36.3)        | 0.408        | 51 (36.2)                        | 58 (34.9)                                | 41 (28.9)                              | 0.373             | 99 (40.2)            | 57 (25.9)            | <b>0.001</b>      |
| Non-surgical soft tissue infection                           | 190 (40.8)     | 132 (43.1)      | 58 (36.3)        | 0.165        | 50 (35.5)                        | 84 (50.6)                                | 47 (33.1)                              | <b>0.003</b>      | 107 (43.5)           | 83 (37.7)            | 0.220             |
| CNS infection                                                | 227 (48.7)     | 153 (50)        | 74 (46.3)        | 0.495        | 59 (41.8)                        | 93 (56)                                  | 65 (45.8)                              | <b>0.035</b>      | 134 (54.5)           | 93 (42.3)            | <b>0.009</b>      |
| Other                                                        | 81 (17.4)      | 63 (20.6)       | 18 (11.3)        | <b>0.014</b> | 29 (20.6)                        | 22 (13.3)                                | 27 (19)                                | 0.199             | 26 (10.6)            | 55 (25)              | <b>&lt; 0.001</b> |
| Expert non-ICU opinion is most likely required in (Organism) |                |                 |                  |              |                                  |                                          |                                        |                   |                      |                      |                   |
| All equal                                                    | 72 (15.5)      | 42 (13.7)       | 30 (18.8)        | 0.177        | 20 (14.2)                        | 23 (13.9)                                | 23 (16.2)                              | 0.828             | 47 (19.1)            | 25 (11.4)            | <b>0.021</b>      |
| MDR                                                          | 119 (25.5)     | 74 (24.2)       | 45 (28.1)        | 0.372        | 36 (25.5)                        | 48 (28.9)                                | 32 (22.5)                              | 0.441             | 70 (28.5)            | 49 (22.3)            | 0.137             |
| XDR                                                          | 200 (42.9)     | 140 (45.8)      | 60 (37.5)        | 0.094        | 42 (29.8)                        | 85 (51.2)                                | 67 (47.2)                              | <b>&lt; 0.001</b> | 120 (48.8)           | 80 (36.4)            | <b>0.009</b>      |
| PDR                                                          | 258 (55.4)     | 181 (59.2)      | 77 (48.1)        | <b>0.024</b> | 73 (51.8)                        | 103 (62)                                 | 77 (54.2)                              | 0.161             | 140 (56.9)           | 118 (53.6)           | 0.514             |
| Fungal infection                                             | 151 (32.4)     | 102 (33.3)      | 49 (30.6)        | 0.603        | 37 (26.2)                        | 64 (38.6)                                | 46 (32.4)                              | 0.072             | 88 (35.8)            | 63 (28.6)            | 0.113             |
| Viral infection                                              | 128 (27.5)     | 85 (27.8)       | 43 (26.9)        | 0.913        | 32 (22.7)                        | 58 (34.9)                                | 34 (23.9)                              | <b>0.028</b>      | 65 (26.4)            | 63 (28.6)            | 0.605             |
| Other                                                        | 8 (1.7)        | 4 (1.3)         | 4 (2.5)          | 0.455        | 4 (2.8)                          | 2 (1.2)                                  | 2 (1.4)                                | 0.515             | 1 (0.4)              | 7 (3.2)              | <b>0.029</b>      |
| None                                                         | 37 (7.9)       | 20 (6.5)        | 17 (10.6)        | 0.148        | 19 (13.5)                        | 2 (1.2)                                  | 14 (9.9)                               | <b>&lt; 0.001</b> | 12 (4.9)             | 25 (11.4)            | <b>0.010</b>      |

HICs, High-Income Countries; LMICs, Low- and Middle-Income Countries; ICU, Intensive Care Unit; SSI, Surgical Site Infection; CNS, Central Nervous System; MDR, Multidrug-Resistant; XDR, Extensively Drug-Resistant; PDR, Pandrug-Resistant.

eTable 6 Knowledge &amp; Training

|                                                                                                                                               | All<br>(N= 466) | Income Class     |                   |         | Background Training               |                                           |                                         |       | Practice Years        |                       |         |
|-----------------------------------------------------------------------------------------------------------------------------------------------|-----------------|------------------|-------------------|---------|-----------------------------------|-------------------------------------------|-----------------------------------------|-------|-----------------------|-----------------------|---------|
|                                                                                                                                               |                 | HICs<br>(N= 306) | LMICs<br>(N= 160) | P       | Critical Care<br>Only<br>(N= 141) | Anesthesia &<br>Critical Care<br>(N= 166) | Medicine &<br>Critical Care<br>(N= 142) | P     | ≤10 years<br>(N= 246) | >10 years<br>(N= 220) | P       |
|                                                                                                                                               |                 |                  |                   |         |                                   |                                           |                                         |       |                       |                       |         |
| Do you think the current level of knowledge and training in intensive care infectious diseases in the country you are practicing is adequate? |                 |                  |                   |         |                                   |                                           |                                         |       |                       |                       |         |
| Strongly Agree                                                                                                                                | 36 (7.7)        | 28 (9.2)         | 8 (5)             | < 0.001 | 14 (9.9)                          | 11 (6.6)                                  | 9 (6.3)                                 | 0.004 | 17 (6.9)              | 19 (8.6)              | < 0.001 |
| Agree                                                                                                                                         | 165 (35.4)      | 127 (41.5)       | 38 (23.8)         |         | 65 (46.1)                         | 54 (32.5)                                 | 42 (29.6)                               |       | 71 (28.9)             | 94 (42.7)             |         |
| Neither                                                                                                                                       | 93 (20)         | 59 (19.3)        | 34 (21.3)         |         | 19 (13.5)                         | 33 (19.9)                                 | 36 (25.4)                               |       | 46 (18.7)             | 47 (21.4)             |         |
| Disagree                                                                                                                                      | 150 (32.2)      | 85 (27.8)        | 65 (40.6)         |         | 36 (25.5)                         | 61 (36.7)                                 | 49 (34.5)                               |       | 96 (39)               | 54 (24.5)             |         |
| Strongly Disagree                                                                                                                             | 22 (4.7)        | 7 (2.3)          | 15 (9.4)          |         | 7 (5)                             | 7 (4.2)                                   | 6 (4.2)                                 |       | 16 (6.5)              | 6 (2.7)               |         |
| Do you think there is more need for training in infectious diseases for intensive care doctors?                                               |                 |                  |                   |         |                                   |                                           |                                         |       |                       |                       |         |
| Strongly Agree                                                                                                                                | 264 (56.7)      | 151 (49.3)       | 113 (70.6)        | 0.014   | 84 (59.6)                         | 102 (61.4)                                | 69 (48.6)                               | 0.711 | 165 (63.4)            | 108 (49.1)            | 0.423   |
| Agree                                                                                                                                         | 181 (38.8)      | 135 (44.1)       | 46 (28.8)         |         | 52 (36.9)                         | 57 (34.3)                                 | 66 (46.5)                               |       | 80 (32.5)             | 101 (45.9)            |         |
| Neither                                                                                                                                       | 17 (3.6)        | 16 (5.2)         | 1 (0.6)           |         | 5 (3.5)                           | 6 (3.6)                                   | 5 (3.5)                                 |       | 7 (2.8)               | 10 (4.5)              |         |
| Disagree                                                                                                                                      | 4 (0.9)         | 4 (1.3)          | 0 (0)             |         | 0 (0)                             | 1 (0.6)                                   | 2 (1.4)                                 |       | 3 (1.2)               | 1 (0.5)               |         |
| Strongly Disagree                                                                                                                             | 0 (0)           | 0 (0)            | 0 (0)             |         | 0 (0)                             | 0 (0)                                     | 0 (0)                                   |       | 0 (0)                 | 0 (0)                 |         |
| How do you think more training will impact the service in your unit?                                                                          |                 |                  |                   |         |                                   |                                           |                                         |       |                       |                       |         |
| Improve patients' outcome                                                                                                                     | 367 (78.8)      | 225 (73.5)       | 142 (88.8)        | < 0.001 | 111 (78.7)                        | 133 (80.1)                                | 109 (76.8)                              | 0.773 | 194 (78.9)            | 173 (78.6)            | 1       |
| Decrease cost                                                                                                                                 | 298 (63.9)      | 184 (60.1)       | 114 (71.3)        | 0.019   | 93 (66)                           | 104 (62.7)                                | 93 (65.5)                               | 0.803 | 153 (62.2)            | 145 (65.9)            | 0.440   |



# PRACT-INF-ICU (Supplementary Material)

## Tables

|                                                                          | All<br>(N= 466) | Income Class     |                   |                   | Background Training               |                                           |                                         |       | Practice Years        |                       |       |
|--------------------------------------------------------------------------|-----------------|------------------|-------------------|-------------------|-----------------------------------|-------------------------------------------|-----------------------------------------|-------|-----------------------|-----------------------|-------|
|                                                                          |                 | HICs<br>(N= 306) | LMICs<br>(N= 160) | P                 | Critical Care<br>Only<br>(N= 141) | Anesthesia &<br>Critical Care<br>(N= 166) | Medicine &<br>Critical Care<br>(N= 142) | P     | ≤10 years<br>(N= 246) | >10 years<br>(N= 220) | P     |
| Decrease antimicrobial resistance                                        | 396 (85)        | 256 (83.7)       | 140 (87.5)        | 0.339             | 121 (85.8)                        | 141 (84.9)                                | 119 (83.8)                              | 0.894 | 209 (85)              | 187 (85)              | 1     |
| Save effort and/or time                                                  | 172 (36.9)      | 104 (34)         | 68 (42.5)         | 0.086             | 54 (38.3)                         | 60 (36.1)                                 | 54 (38)                                 | 0.912 | 89 (36.2)             | 83 (37.7)             | 0.773 |
| Sole responsibility will improve communication with patients & relatives | 62 (13.3)       | 28 (9.2)         | 34 (21.3)         | <b>&lt; 0.001</b> | 20 (14.2)                         | 15 (9)                                    | 24 (16.9)                               | 0.114 | 29 (11.8)             | 33 (15)               | 0.340 |
| Other                                                                    | 8 (1.7)         | 6 (2)            | 2 (1.3)           | 0.721             | 1 (0.7)                           | 2 (1.2)                                   | 5 (3.5)                                 | 0.157 | 5 (2)                 | 3 (1.4)               | 0.728 |

HICs, High-Income Countries; LMICs, Low- and Middle-Income Countries.

**eTable 7** Impact of medicolegal issues and defensive medicine on AMT decision

|                                                                                                                    | All<br>(N=466) | Income Class    |                  |         | Background Training              |                                          |                                        |       | Practice Years       |                      |       |
|--------------------------------------------------------------------------------------------------------------------|----------------|-----------------|------------------|---------|----------------------------------|------------------------------------------|----------------------------------------|-------|----------------------|----------------------|-------|
|                                                                                                                    |                | HICs<br>(N=306) | LMICs<br>(N=160) | P       | Critical Care<br>Only<br>(N=141) | Anesthesia &<br>Critical Care<br>(N=166) | Medicine &<br>Critical Care<br>(N=142) | P     | ≤10 years<br>(N=246) | >10 years<br>(N=220) | P     |
| Do you think medicolegal issues and defensive medicine are impacting antimicrobial prescription?                   |                |                 |                  |         |                                  |                                          |                                        |       |                      |                      |       |
| Strongly Agree                                                                                                     | 102 (21.9)     | 61 (19.9)       | 41 (25.6)        | 0.023   | 32 (22.7)                        | 39 (23.5)                                | 26 (18.3)                              | 0.967 | 56 (22.8)            | 46 (20.9)            | 0.111 |
| Agree                                                                                                              | 229 (49.1)     | 146 (47.7)      | 83 (51.9)        |         | 70 (49.6)                        | 76 (45.8)                                | 74 (52.1)                              |       | 115 (46.7)           | 114 (51.8)           |       |
| Neither                                                                                                            | 66 (14.2)      | 44 (14.4)       | 22 (13.8)        |         | 18 (12.8)                        | 26 (15.7)                                | 21 (14.8)                              |       | 31 (12.6)            | 35 (15.9)            |       |
| Disagree                                                                                                           | 54 (11.6)      | 41 (13.4)       | 13 (8.1)         |         | 15 (10.6)                        | 22 (13.3)                                | 16 (11.3)                              |       | 34 (13.8)            | 20 (9.1)             |       |
| Strongly Disagree                                                                                                  | 15 (3.2)       | 14 (4.6)        | 1 (0.6)          |         | 6 (4.3)                          | 3 (1.8)                                  | 5 (3.5)                                |       | 10 (4.1)             | 5 (2.3)              |       |
| In your opinion, by which mean medicolegal issues and defensive medicine are affecting antimicrobial prescription? |                |                 |                  |         |                                  |                                          |                                        |       |                      |                      |       |
| Lower threshold to prescribe antibiotics                                                                           | 257 (55.2)     | 167 (54.6)      | 90 (56.3)        | 0.769   | 73 (51.8)                        | 93 (56)                                  | 79 (55.6)                              | 0.722 | 138 (56.1)           | 119 (54.1)           | 0.709 |
| More antibiotic combinations                                                                                       | 199 (42.7)     | 112 (36.6)      | 87 (54.4)        | < 0.001 | 73 (51.8)                        | 60 (36.1)                                | 57 (40.1)                              | 0.018 | 102 (41.5)           | 97 (44.1)            | 0.575 |
| Longer course                                                                                                      | 204 (43.8)     | 130 (42.5)      | 74 (46.3)        | 0.491   | 62 (44)                          | 81 (48.8)                                | 52 (36.6)                              | 0.098 | 103 (41.9)           | 101 (45.9)           | 0.401 |
| Less frequent de-escalation                                                                                        | 213 (45.7)     | 140 (45.8)      | 73 (45.6)        | 1       | 69 (48.9)                        | 74 (44.6)                                | 61 (43)                                | 0.578 | 111 (45.1)           | 102 (46.4)           | 0.852 |
| Seeking non-ICU expertise                                                                                          | 99 (21.2)      | 63 (20.6)       | 36 (22.5)        | 0.635   | 33 (23.4)                        | 37 (22.3)                                | 26 (18.3)                              | 0.543 | 52 (21.1)            | 47 (21.4)            | 1     |
| Other                                                                                                              | 11 (2.4)       | 11 (3.6)        | 0 (0)            | 0.019   | 4 (2.8)                          | 5 (3)                                    | 2 (1.4)                                | 0.621 | 5 (2)                | 6 (2.7)              | 0.763 |

HICs, High-Income Countries; LMICs, Low- and Middle-Income Countries; AMT, Antimicrobial Therapy.
